# Supplementary material for: Metabolic Mechanism of Bacillus sp. LM24 under Abamectin Stress
Source: MDPI journal article supplement (doi:10.3390/ijerph20043068), 2023-02-09
Supplement: s1 [file s1]

## **Supplementary Materials**

### **Metabolic Mechanism of *Bacillus* sp LM24 under Abamectin Stress**

Yueping Zhu <sup>1,2,\*</sup>, Qilai Xie <sup>1,3,\*</sup>, Jinshao Ye <sup>4</sup>, Ruzhen Wang <sup>2</sup>, Xudong Yin <sup>2</sup>, Wenyu Xie <sup>2</sup> and Dehao Li <sup>2</sup>

1 College of Natural Resources and Environment, South China Agricultural University, Guangzhou 510642, China

2 Guangdong Provincial Key Laboratory of Petrochemical Pollution Processes and Control, School of Environmental Science and Engineering, Guangdong University of Petrochemical Technology, Maoming 525000, China

3 Guangdong Provincial Key Laboratory of Agricultural and Rural Pollution Abatement and Environmental Safety, Guangzhou 510642, China

4 Guangdong Key Laboratory of Environmental Pollution and Health, School of Environment, Jinan University, Guangzhou 510632, China

\* Corresponding author. [gdmzyp@163.com](mailto:gdmzyp@163.com) (Y.Z.); [xieql@scau.edu.cn](mailto:xieql@scau.edu.cn) (Q.X.)

## Content

**Table S1** Identification Results of ABM Degradation Products by HPLC-MS

**Table S2** List of differential metabolites in the 24 h 1 A-24 h CK group.

**Table S3** List of differential metabolites in the 48 h 1 A-48 h CK group.

**Figure S1** Mass Spectra of Six Biodegradable Products of ABM

**Figure S2** Volcano plot of differential metabolite screening in the 48h 0.5A-48h CK group

**Figure S3** Hierarchical clustering heat map analysis of differential metabolites in the 48 h 0.5 A-48 h CK group

**Figure S4** Enrichment bubble diagram of the metabolic pathways of differential metabolites (a): 24 h 0.5A-24 h CK group; (b): 48 h 0.5A-48 h CK group; (c): 48 h 0.5A-24h 0.5A group; (d): 48 h CK-24 h CK group.

**Figure S5** Volcano plot of differential metabolite screening in the 24 h 1A-24 h CK group

**Figure S6** Hierarchical clustering heat map analysis of differential metabolites in the 24h 1A~24h CK group

**Figure S7** Volcano plot of differential metabolite screening in the 48 h 1A-48 h CK group

**Figure S8** Hierarchical clustering heat map analysis of differential metabolites in the 48h 1A~48h CK group

**Figure S9** Enrichment bubble diagram of the metabolic pathways of differential metabolites (a):24 h 1A-24h CK group;(b):4 8h 1A-48h CK group;(c):48 h 1A-24 h 1A group;(d):48 h CK-24 h CKgroup (The vertical and horizontal coordinates and colors in the figure have the same meanings as those in Figure S4)

**Table S1** Identification Results of ABM Degradation Products by HPLC-MS

| Identification products | Retention time<br>(min) | Measured<br>mass (m/z) | formula                                         |
|-------------------------|-------------------------|------------------------|-------------------------------------------------|
| Metabolite A            | 3.98                    | 716.452                | C <sub>41</sub> H <sub>64</sub> O <sub>10</sub> |
| Metabolite B            | 7.17                    | 402.095                | C <sub>23</sub> H <sub>30</sub> O <sub>6</sub>  |
| Metabolite C            | 14.11                   | 304.188                | C <sub>15</sub> H <sub>28</sub> O <sub>6</sub>  |
| Metabolite D            | 13.12                   | 162.032                | C <sub>7</sub> H <sub>14</sub> O <sub>4</sub>   |
| Metabolite E            | 2.62                    | 168.076                | C <sub>11</sub> H <sub>20</sub> O               |
| Metabolite F            | 9.15                    | 314.079                | C <sub>17</sub> H <sub>30</sub> O <sub>5</sub>  |

**Table S2** List of differential metabolites in the 24 h 1A-24 h CK group.

| S/N                             | name of metabolite                                                                        | Log <sub>2</sub> FC<br>value | Metabolite<br>classification       |
|---------------------------------|-------------------------------------------------------------------------------------------|------------------------------|------------------------------------|
| <b>Up-regulated metabolites</b> |                                                                                           |                              |                                    |
| 1                               | (±)-1-(4-Methylphenyl)ethanol                                                             | 1.44                         | Benzene compounds                  |
| 2                               | 2,5-Dimethylbenzaldehyde                                                                  | 1.39                         |                                    |
| 3                               | (+)-Myristinin A                                                                          | 3.58                         | Lipids and lipid-like<br>molecules |
| 4                               | Lucidenolactone                                                                           | 2.04                         |                                    |
| 5                               | Melleolide                                                                                | 1.81                         |                                    |
| 6                               | 3,7,8,15-Scirpenetetrol                                                                   | 1.72                         |                                    |
| 7                               | 1-O-(2R-hydroxy-4Z-nonadecenyl)-sn-glycerol                                               | 1.68                         |                                    |
| 8                               | Armillarin                                                                                | 1.38                         |                                    |
| 9                               | Prednicarbate                                                                             | 1.23                         |                                    |
| 10                              | N,N-dimethyl-Safingol                                                                     | 0.87                         |                                    |
| 11                              | 27-nor-24S-methylcholestan-3beta,4beta,5alpha,6alpha,7beta,8beta,14alpha,15alpha,24-nonol | 0.62                         |                                    |
| 12                              | 1-palmitoylglycerophosphocholine                                                          | 0.58                         |                                    |
| 13                              | Kurilensoside F                                                                           | 0.25                         |                                    |
| 14                              | PI(17:0/0:0)                                                                              | 0.21                         |                                    |
| 15                              | Sphinganine                                                                               | 1.33                         | Organic nitrogen<br>compounds      |

|                            |                                                         |        |                                     |
|----------------------------|---------------------------------------------------------|--------|-------------------------------------|
| 16                         | Austalide L                                             | 1.60   | Phenylpropionic acid and polyketone |
| 17                         | Lasiodine A                                             | 3.48   | Unclassified                        |
| 18                         | Enalkiren                                               | 2.57   |                                     |
| 19                         | 4-Hydroxycinnamyl alcohol 4-D-glucoside                 | 1.88   |                                     |
| 20                         | DEACETYLGEDUNIN                                         | 1.85   |                                     |
| 21                         | 4-hydroxy Nonenal Glutathione-d3                        | 1.64   |                                     |
| 22                         | 3β-HYDROXYDEOXODIHYDRODEOXYGED UNIN                     | 1.12   |                                     |
| 23                         | PGF2α-11-acetate methyl ester                           | 0.53   |                                     |
| 24                         | FENDILINE                                               | 0.51   |                                     |
| Down-regulated metabolites |                                                         |        |                                     |
| 1                          | chondroitin sulfate E (GalNAc4,6diS-GlcA), precursor 5a | −0.43  | Benzene compounds                   |
| 2                          | MGDG(18:1(9Z)/18:1(9Z))                                 | −35.57 | Lipids and lipid-like molecules     |
| 3                          | PS(O-18:0/14:0)                                         | −6.83  |                                     |
| 4                          | PA(18:0/18:2(9Z,12Z))                                   | −0.65  |                                     |
| 5                          | octadec-11Z-enol                                        | −0.40  |                                     |
| 6                          | 13Z-Octadecen-1-ol                                      | −0.33  |                                     |
| 7                          | N-stearoyl valine                                       | −0.17  |                                     |
| 8                          | PC(15:0/18:2(9Z,12Z))                                   | −0.10  |                                     |
| 9                          | L-2,4-diaminobutyric acid                               | −0.25  | Organic acids and derivatives       |
| 10                         | gamma-Glutamylglutamic acid                             | −0.16  |                                     |
| 11                         | 1-(2-Furanyl)-1-pentanone                               | −0.11  | Organic oxygen compounds            |
| 12                         | Aluminium dodecanoate                                   | −0.67  | Unclassified                        |
| 13                         | Atraton                                                 | −0.36  |                                     |
| 14                         | CYCLOCREATINE                                           | −0.32  |                                     |
| 15                         | DL-Histidinol                                           | −0.28  |                                     |
| 16                         | Azoprocarbazine                                         | −0.22  |                                     |
| 17                         | GW 4869                                                 | −0.18  |                                     |
| 18                         | (E)-2-nonen-1-al                                        | −0.18  |                                     |

**Table S3** List of differential metabolites in the 48 h 1A-48 h CK group.

| S/N                             | name of metabolite                   | Log <sub>2</sub> FC value | Metabolite classification       |
|---------------------------------|--------------------------------------|---------------------------|---------------------------------|
| <b>Up-regulated metabolites</b> |                                      |                           |                                 |
| 1                               | 5-Sulfo-1,3-benzenedicarboxylic acid | 0.78                      | Benzene compounds               |
| 2                               | Avermectin B1a                       | 36.70                     | Lipids and lipid-like molecules |
| 3                               | Avermectin A1a                       | 34.10                     |                                 |
| 4                               | PHDdiA-PG                            | 31.99                     |                                 |

|                            |                                                                                |       |                                 |
|----------------------------|--------------------------------------------------------------------------------|-------|---------------------------------|
| 5                          | 16-Oxoandrostenediol                                                           | 10.20 |                                 |
| 6                          | 25-Cinnamoyl-vulgaroside                                                       | 8.54  |                                 |
| 7                          | PHOOA-PA                                                                       | 7.66  |                                 |
| 8                          | 8-Epiiridotrial glucoside                                                      | 1.31  |                                 |
| 9                          | Toxin T2 tetrol                                                                | 1.23  |                                 |
| 10                         | Eplerenone                                                                     | 0.41  |                                 |
| 11                         | PA(O-16:0/13:0)                                                                | 0.15  |                                 |
| 12                         | Poppy acid                                                                     | 4.74  | Organoheterocyclic compounds    |
| 13                         | Quinolinic acid                                                                | 2.27  |                                 |
| 14                         | 2,6-Pyridinedicarboxylic acid                                                  | 2.10  |                                 |
| 15                         | Picolinic acid                                                                 | 2.06  |                                 |
| 16                         | Bissulfine                                                                     | 4.90  | Organosulfur compounds          |
| 17                         | 11β-Hydroxyisoandrosterone                                                     | 31.82 | Unclassified                    |
| 18                         | Kabiramide C                                                                   | 31.14 |                                 |
| 19                         | Methylthiobenzoic acid                                                         | 2.34  |                                 |
| 20                         | Calcium L-aspartate                                                            | 1.97  |                                 |
| 21                         | Sesamex                                                                        | 1.26  |                                 |
| 22                         | Aminopentol                                                                    | 0.99  |                                 |
| 23                         | (2R)-O-Phospho-3-sulfolactate                                                  | 0.66  |                                 |
| 24                         | (±)-Glycerol 1-monophosphate K salt (1:2)                                      | 0.48  |                                 |
| 25                         | Butyl<br>4'-O-butanoyl-6-O-hexadecanoyl-neohesperidoside                       | 0.33  |                                 |
| Down-regulated metabolites |                                                                                |       |                                 |
| 1                          | 6,7-Dihydro-4-(hydroxymethyl)-2-(p-hydroxyphenethyl)-7-methyl-5H-2-pyrindinium | −0.19 | Benzene compounds               |
| 2                          | Muzanzagenin                                                                   | −6.54 | Lipids and lipid-like molecules |
| 3                          | PA(16:0/22:4(7Z,10Z,13Z,16Z))                                                  | −0.55 |                                 |
| 4                          | SM(d18:1/24:1(15Z))                                                            | −0.43 |                                 |
| 5                          | PC(15:0/18:2(9Z,12Z))                                                          | −0.28 |                                 |
| 6                          | Gluten exorphin C                                                              | −1.00 | Organic acids and derivatives   |
| 7                          | 8-O-Methyloblongine                                                            | −1.22 | Organoheterocyclic compounds    |
| 8                          | Ureidoglycine                                                                  | −0.40 | Unclassified                    |
| 9                          | PG(16:0/18:1(9Z))[U]                                                           | −0.11 |                                 |

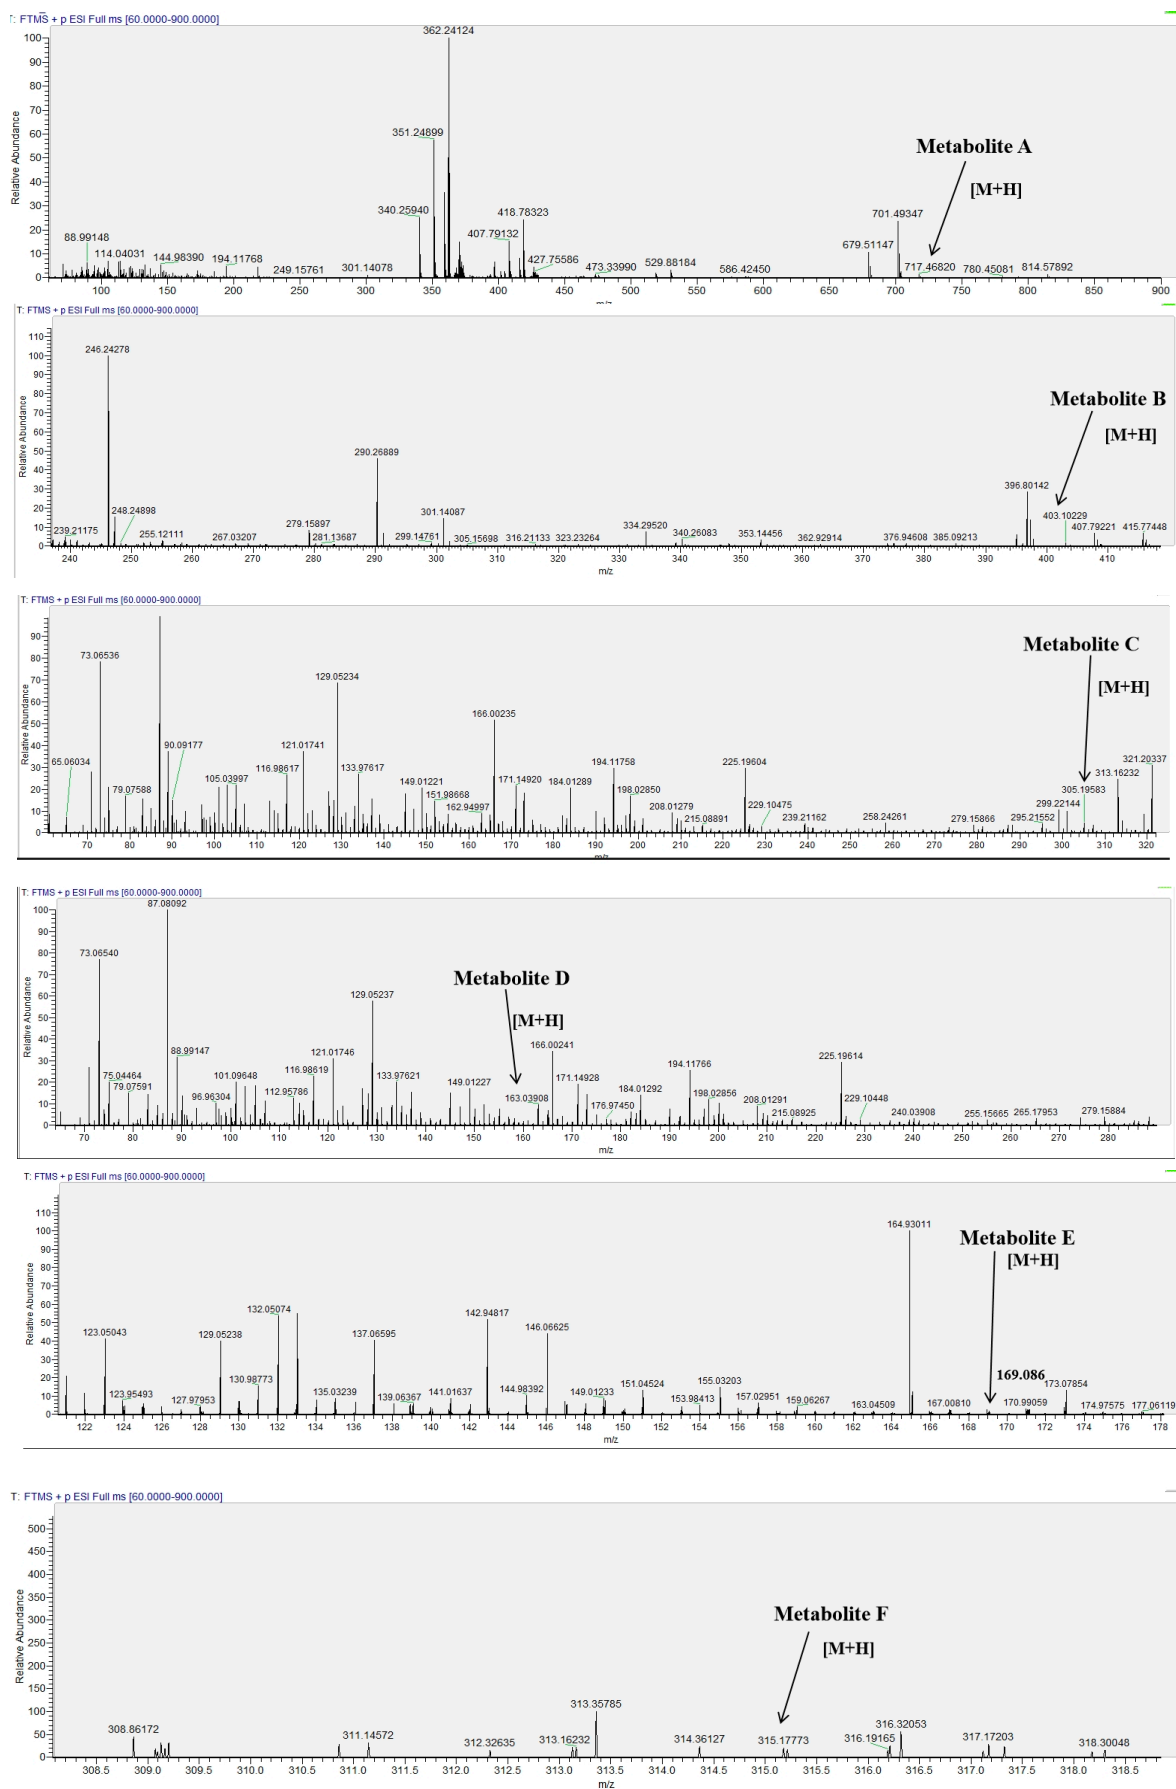

**Figure S1** Mass Spectra of Six Biodegradable Products of ABM

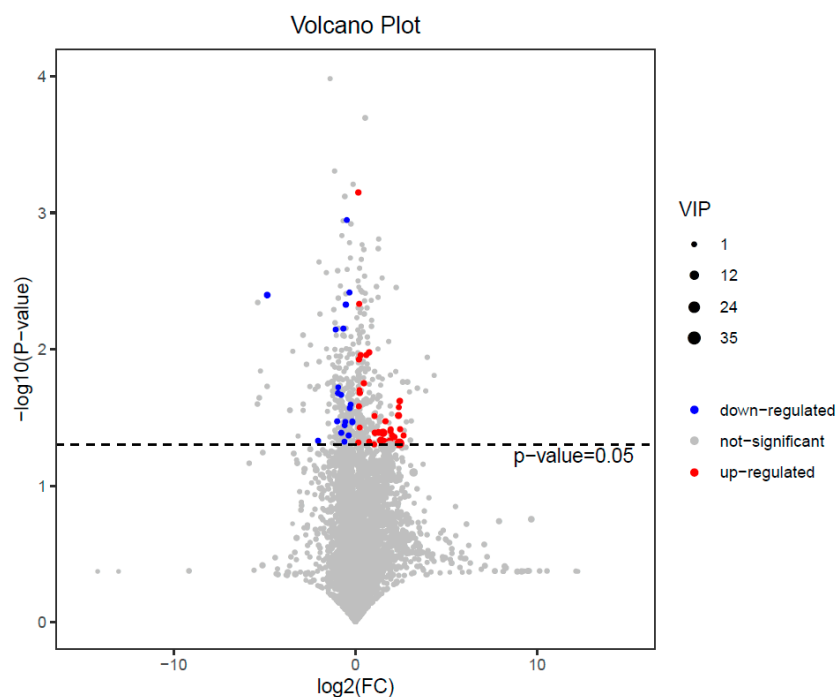

**Figure S2** Volcano plot of differential metabolite screening in the 48 h 0.5A-48 h CK group

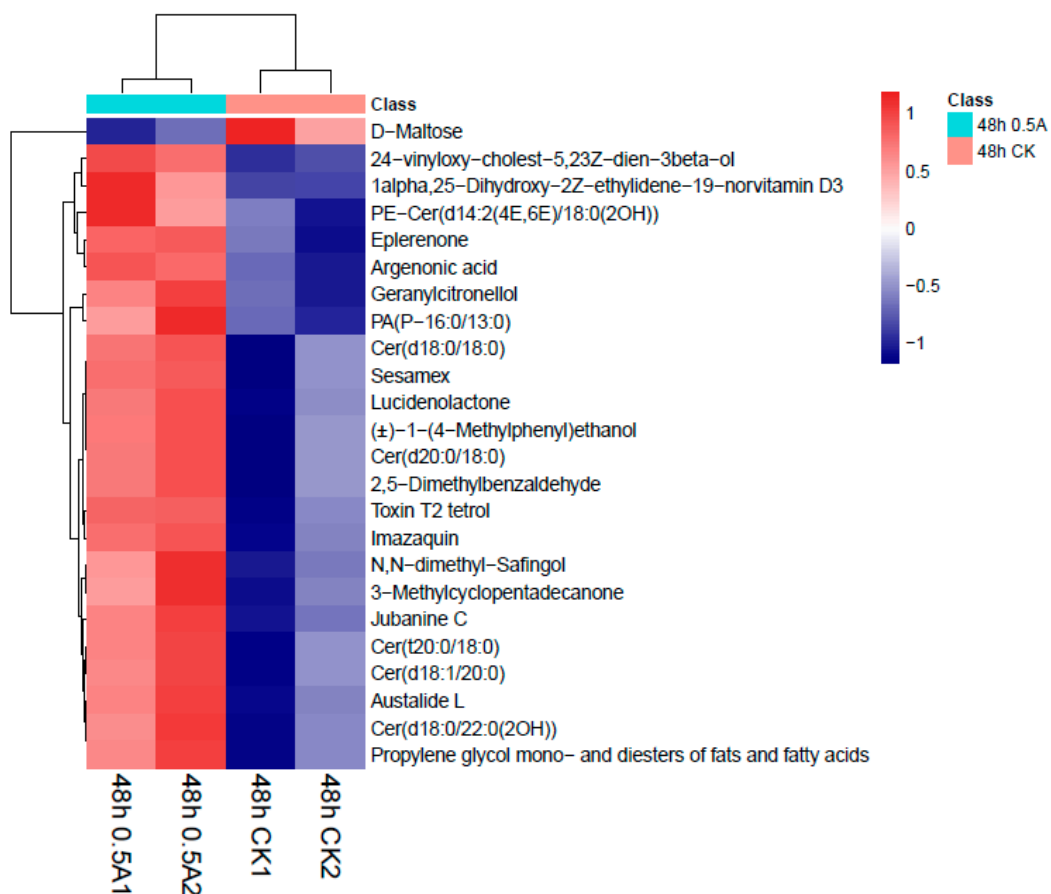

**Figure S3** Hierarchical clustering heat map analysis of differential metabolites in the 48 h 0.5A-48 h CK group

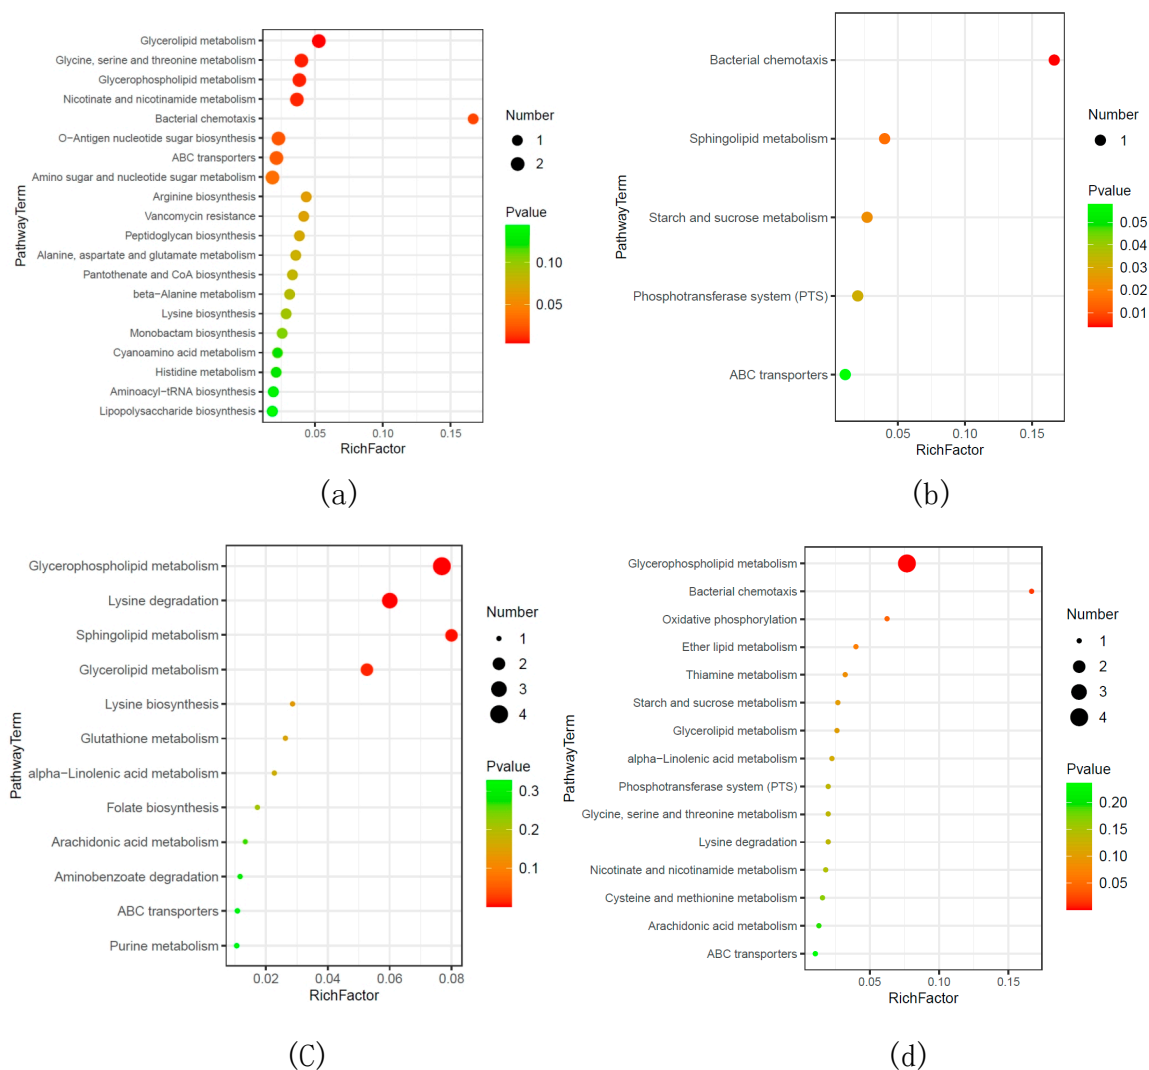

**Figure S4** Enrichment bubble diagram of the metabolic pathways of differential metabolites (a): 24h 0.5A-24h CK group; (b): 48h 0.5A-48h CK group; (c): 48h 0.5A-24h 0.5A group; (d): 48h CK-24h CK group.

The ordinate in the figure is the name of the metabolic pathway and the Rich factor on the abscissa is the enrichment factor. The larger the Rich factor, the greater the degree of enrichment; the colour turning from green to red represents decreasing p-values, and the deeper the shade of red represents more significance in the metabolic pathway differentials. Larger dots indicate that more metabolites were enriched in the pathway.



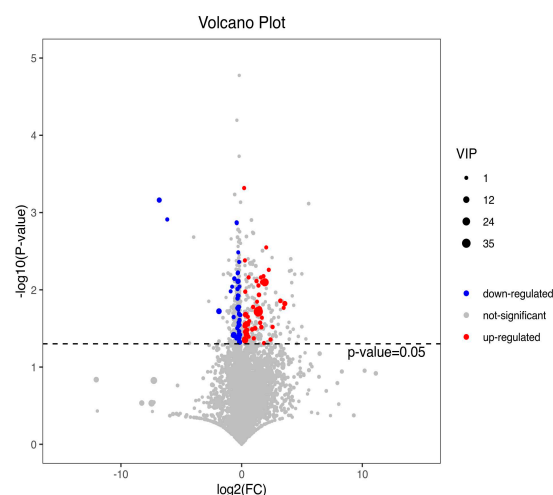

**Figure S5** Volcano plot of differential metabolite screening in the 24 h 1A-24 h CK group

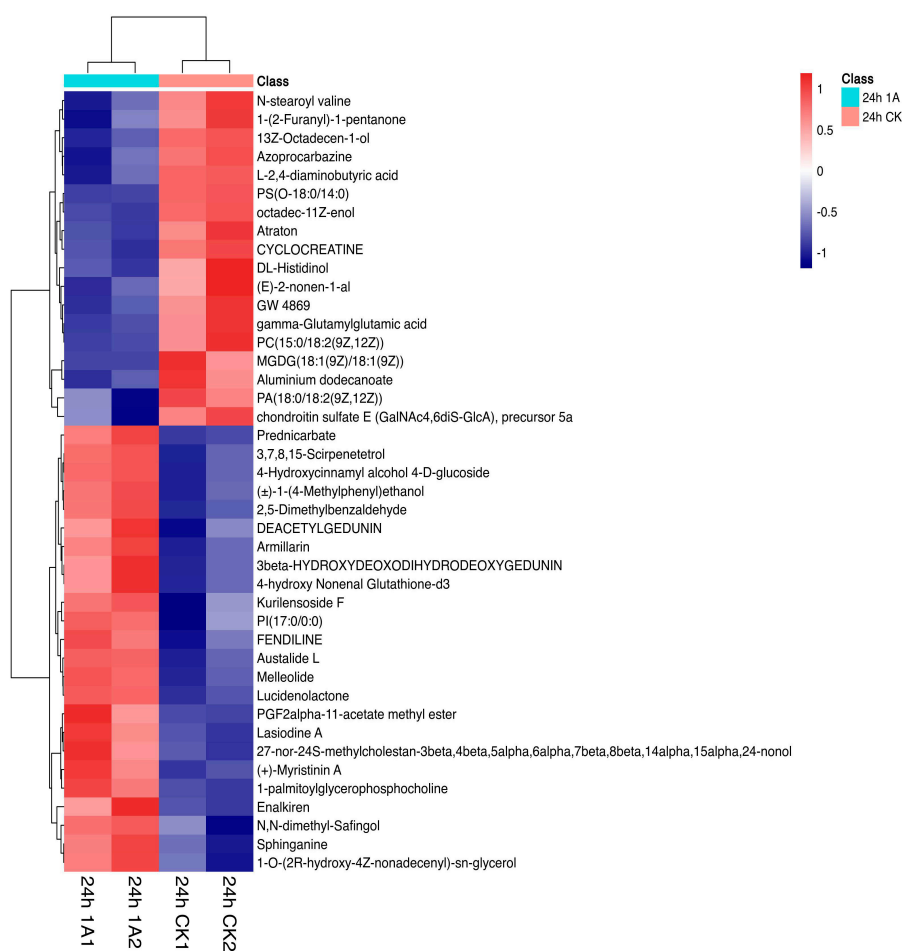

**Figure S6** Hierarchical clustering heat map analysis of differential metabolites in the 24 h 1A-24 h CK group

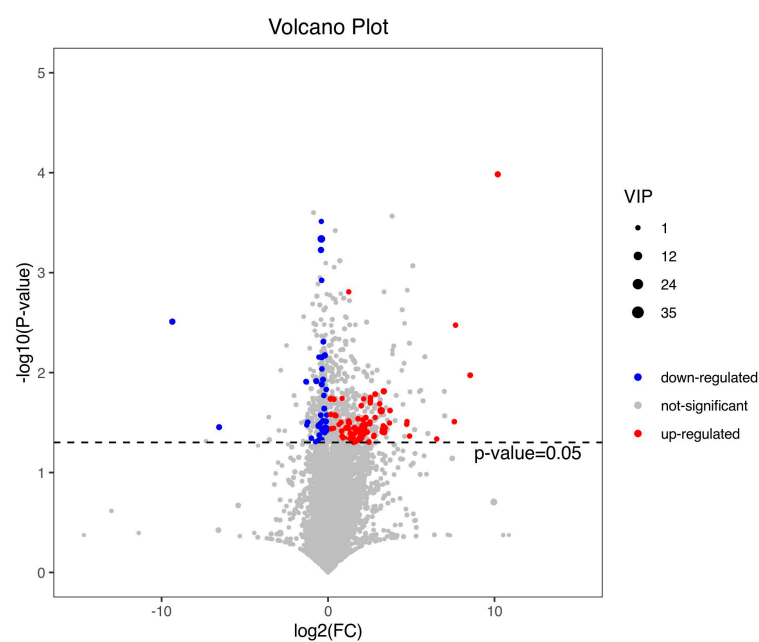

**Figure S7** Volcano plot of differential metabolite screening in the 48 h 1A - 48 h CK group

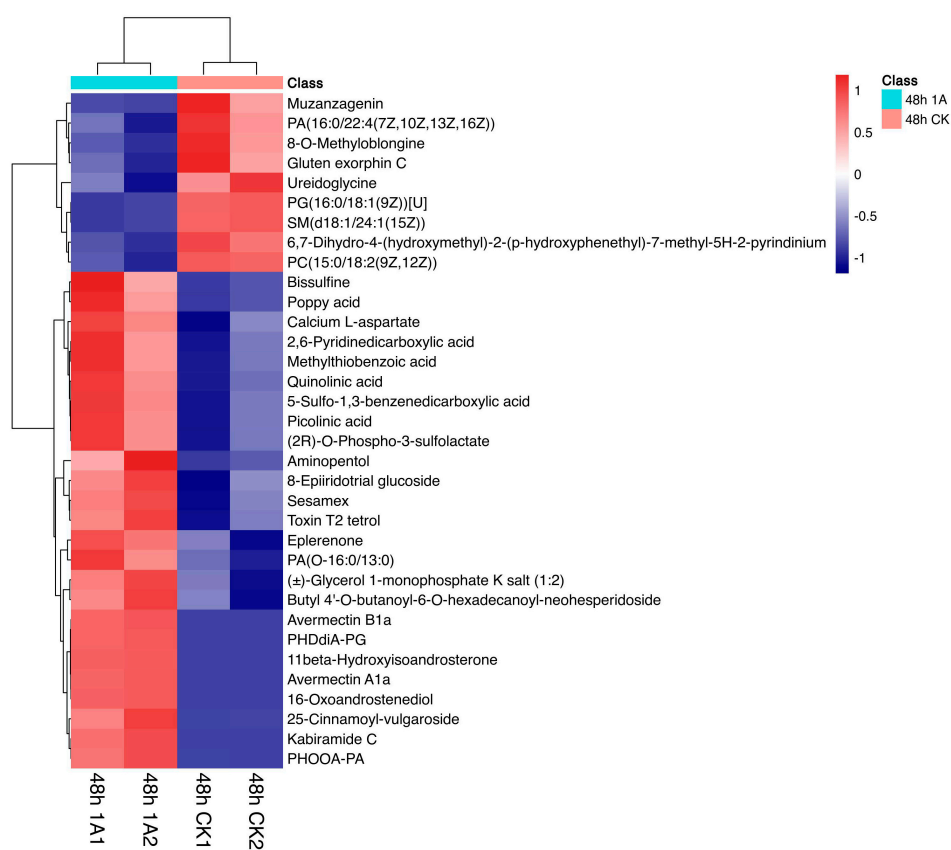

**Figure S8** Hierarchical clustering heat map analysis of differential metabolites in the 48 h 1A-48 h CK group

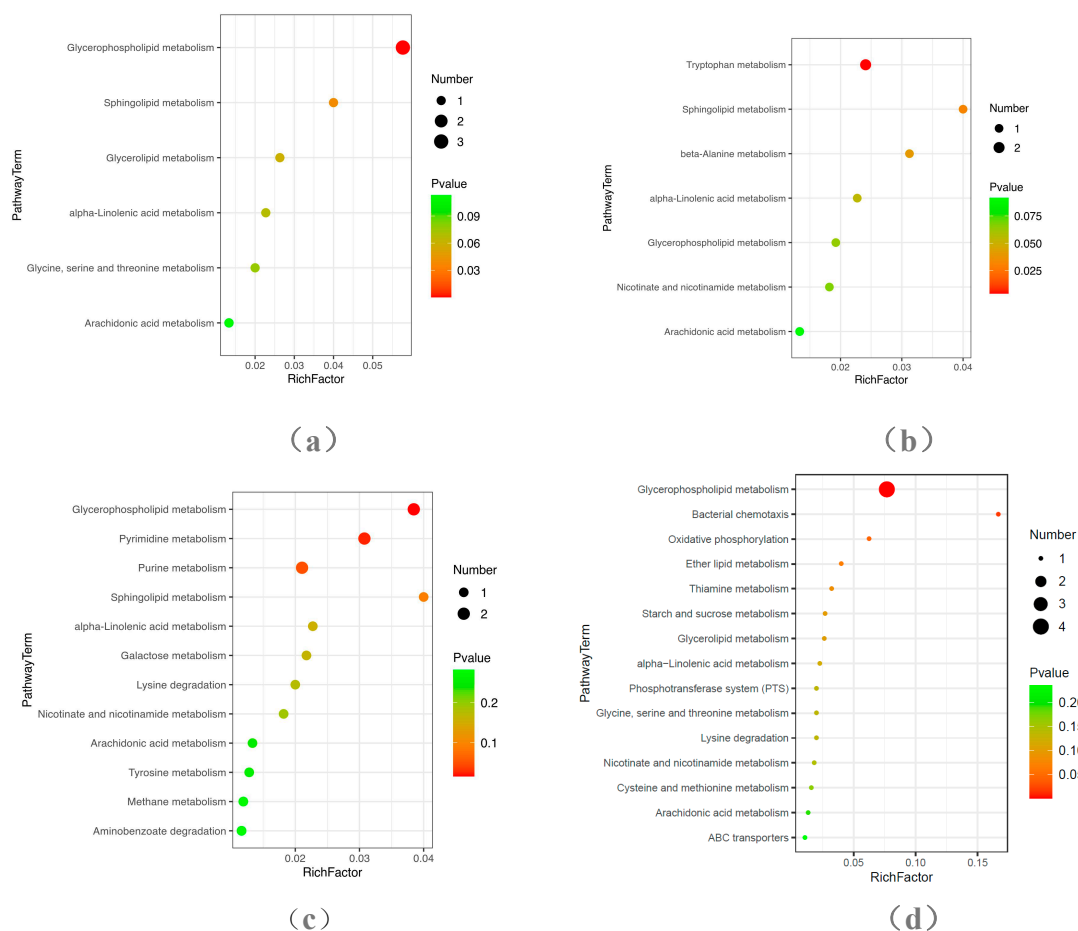

**Figure S9** Enrichment bubble diagram of the metabolic pathways of differential metabolites (a):24 h 1A-24 h CK group;(b):48 h 1A-48 h CK group;(c):48 h 1A-24 h 1A group;(d):48h CK-24h CKgroup (The vertical and horizontal coordinates and colors in the figure have the same meanings as those in Figure S4)
